# Supplementary material for: Zika Virus Causes Persistent Infection in Porcine Conceptuses and may Impair Health in Offspring
Source: PubMed Central journal article supplement — eBioMedicine. 2017 Sep 21;25:73–86. doi: 10.1016/j.ebiom.2017.09.021 (PMC5704061; doi:10.1016/j.ebiom.2017.09.021), 2017-09-21
Supplement: mmc12.pdf [file mmc12.pdf]

283 **SI Figures**

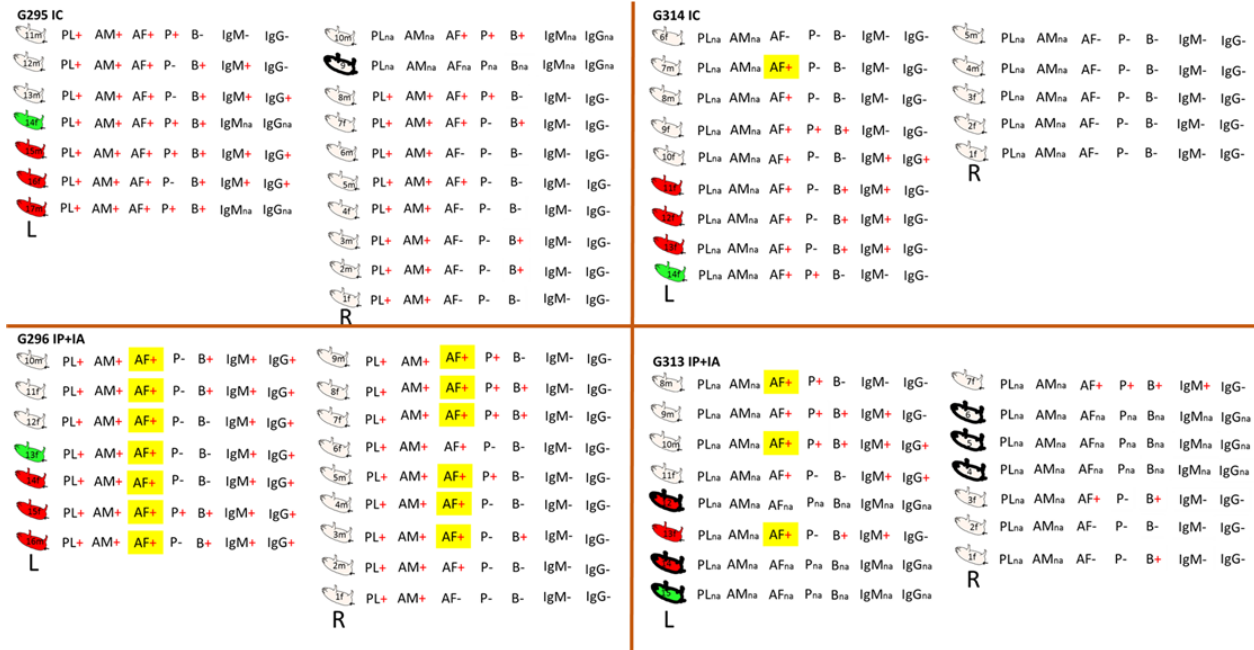

284

285 **Fig. S1. Schematic representation of uteri with fetuses from experimental gilts.** In total, we

286 tested 24 and 62 fetuses from two control (G270 C and G312 C, not shown) and four experimental

287 (G295 IC, G296 IP+IA, G313 IP+IA, and G314 IC) gilts (a gilt is a pig pregnant for the first time)

288 respectively. Four fetuses close to the tip of the left uterine horn (L) were inoculated. R – the tip

289 of the right uterine horn. Fetuses were inoculated with ZIKV (colored red) or mock-inoculated

290 with media (colored green) at 50 gestational days (gd) (duration of gestation in pigs is 114-115

291 days). Animals were sampled 28 days later. Fetuses demarcated in bold are mummies. In G295 IC

292 and G314 IC, fetuses were inoculated intracerebrally (IC) with 4 log<sub>10</sub> TCID<sub>50</sub> of ZIKV. In G296

293 IP+IA and G313 IP+IA, fetuses were inoculated intraperitoneally (IP) + intra-amniotic (IA) with

294 5 log<sub>10</sub> TCID<sub>50</sub> of ZIKV. In each of two control gilts, two fetuses were mock-inoculated with virus-

295 free media IC and two IP+IA (not shown). These fetuses were also inoculated at 50 gd and sampled

296 28 days later. Numbers and letters (f - female and m - male) represent fetal identification number

297 and gender. Numbers also indicate a sampling order. Placenta (PL), amniotic membranes (AM),

298 amniotic fluid (AF), fetal plasma (P) and brain (B) were tested by the ZIKV-specific RT-PCR.  
299 Data for the brain represent combined results from the cerebrum and cerebellum obtained by virus-  
300 specific RT-PCR and *in situ* hybridization. The results are “-” negative or “+” positive. Samples  
301 were also tested for infectious ZIKV on Vero E6 cells. The infectious virus was identified in  
302 highlighted AF. Serological results (IgM – IgM antibodies; IgG – IgG antibodies), are “-” negative  
303 or “+” positive. na: samples are not available.

304

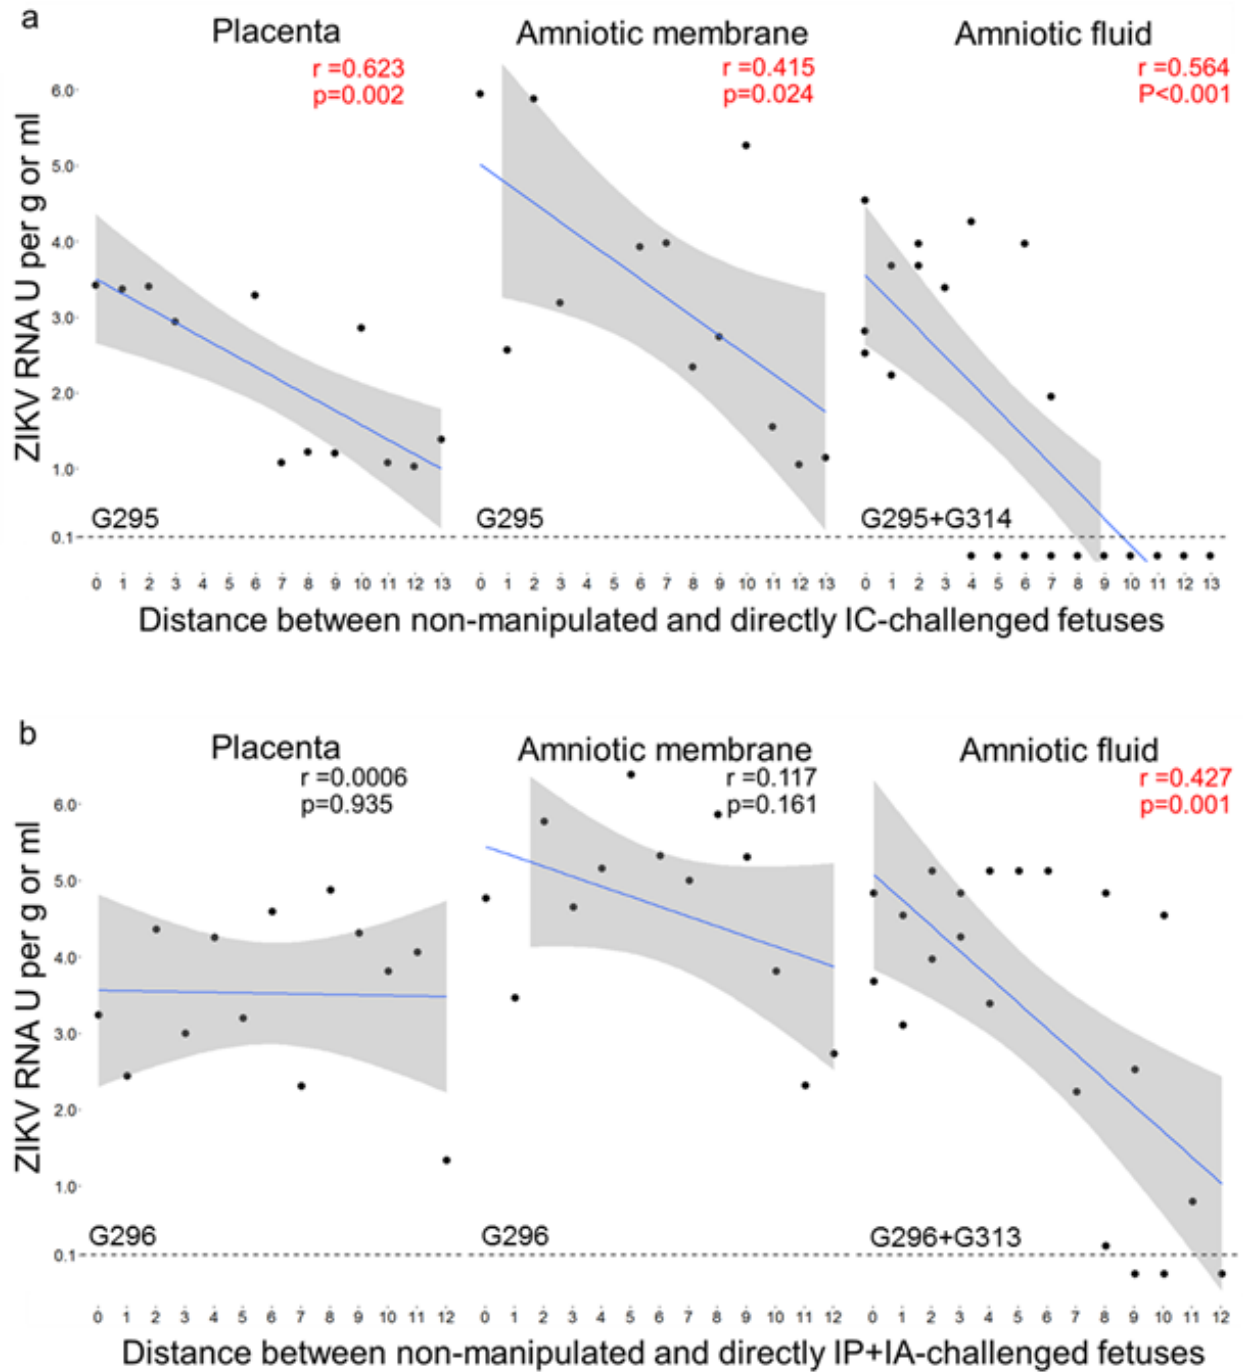

305

306 **Fig. S2. Linear regression modeling the relationship between ZIKV PCR titers in fetal**

307 **samples and the distance between directly virus-inoculated and non-manipulated siblings in**

308 **the uterus.** The linear regression models in intracerebrally (IC) (a) and

309 intraperitoneally+intraamniotic (IP+IA) (b) exposed litters. Only ZIKV titers from trans-infected

310 siblings are represented. **X-axis:** 0 – a fetus adjacent to a directly challenged sibling; 1 to 13 – one,  
311 two, ..., and thirteen fetuses between the directly virus-challenged fetus and non-manipulated  
312 sibling. **Y-axis:** Relative  $\log_{10}$  TCID<sub>50</sub> values were defined as RNA units (U) and expressed as  
313 ZIKV RNA U per gram (g) of tissues or milliliter (ml) of fluids. A blue line is the fitted regression  
314 line with a shade representing the 95% confidence region. A dotted line represents the assay  
315 detection limit. Dots below the detection limit are negative samples. A multiple linear regression  
316 analysis (not shown) modeling the relationship between ZIKV titers, distance between challenged  
317 and non-manipulated siblings, and fetal gender, did not show a significant influence of the fetal  
318 gender on viral loads in PL (p=0.570 for IC litters, p=0.073 for IP+IA litters), AM (p=0.132 for IC  
319 litters, p=0.875 for IP+IA litters), and AF (p=0.104 for IC litters, p=0.218 IP+IA litters), while the  
320 distance between siblings precisely matched linear regression analyses and remained significant.

321

322

323

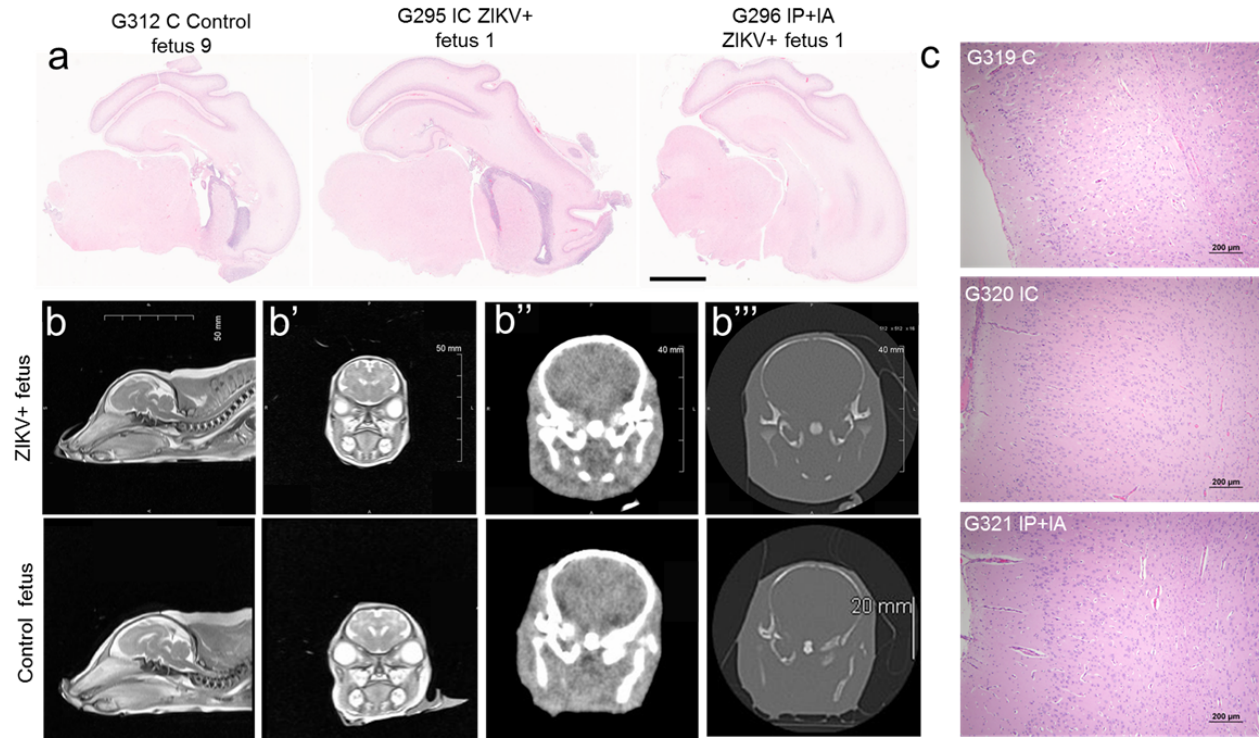

324  
 325 **Fig. S3. Histology and MRI/CT scanning.** (a) The representative images of whole scanned fetal  
 326 brain tissue sections. Examination of H&E stained fetal brain tissue sections did not reveal  
 327 histopathology. The bar is 5 mm. Representative images of computed tomography (CT) and  
 328 magnetic resonance imaging (MRI). Sagittal (b) and axial (b') MRI images of ZIKV-infected and  
 329 control fetal brains. Axial tissue (b'') and bone (b''') window CT images of virus-infected and control  
 330 fetal brains. MRI and CT did not show pathology in fetal brains. (c) Examination of H&E stained  
 331 neonatal brain tissue sections did not reveal histopathology.

332  
 333  
 334  
 335  
 336  
 337

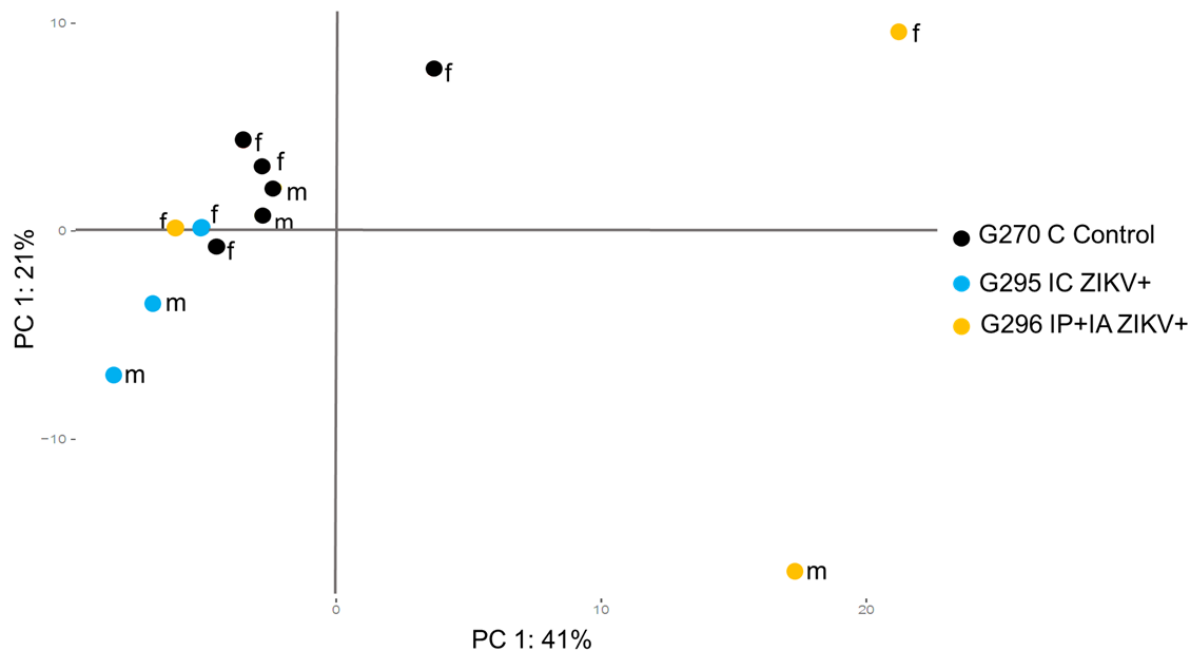

338

339 **Fig. S4.** Principal Component Analyses of RNA-seq data.

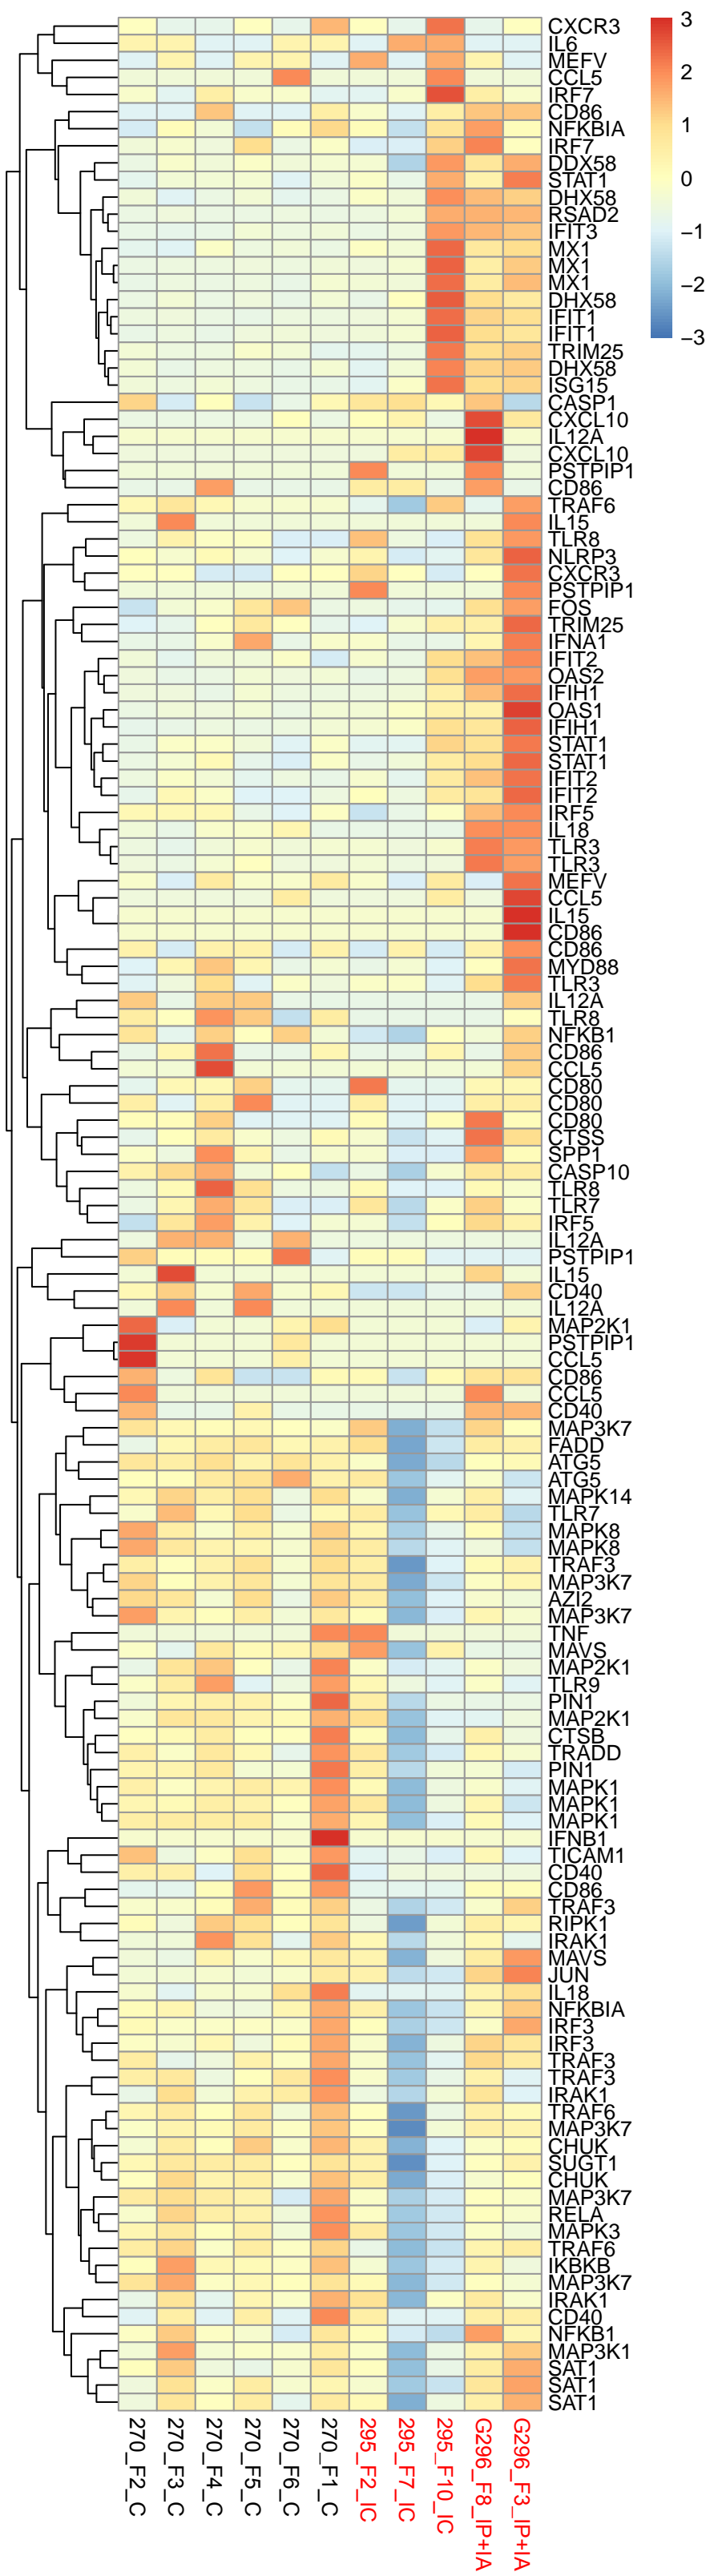

**Fig. S5. Hitmap of the enriched gene set related to antiviral responses.** We tested a set of genes related to antiviral responses assembled from previous ZIKV publications (Bayer et al., 2016; Hamel et al., 2015; Li et al., 2016; Quicke et al., 2016; references are in the manuscript text), and found that infected fetuses from the IP+IA and IC groups were enriched in this term (False discovery rate (FDR) corrected p-value = 0.102 for the IP+IA group and FDR p-value = 0.175 for the IC group, where FDR p-value < 0.25 is considered significant).

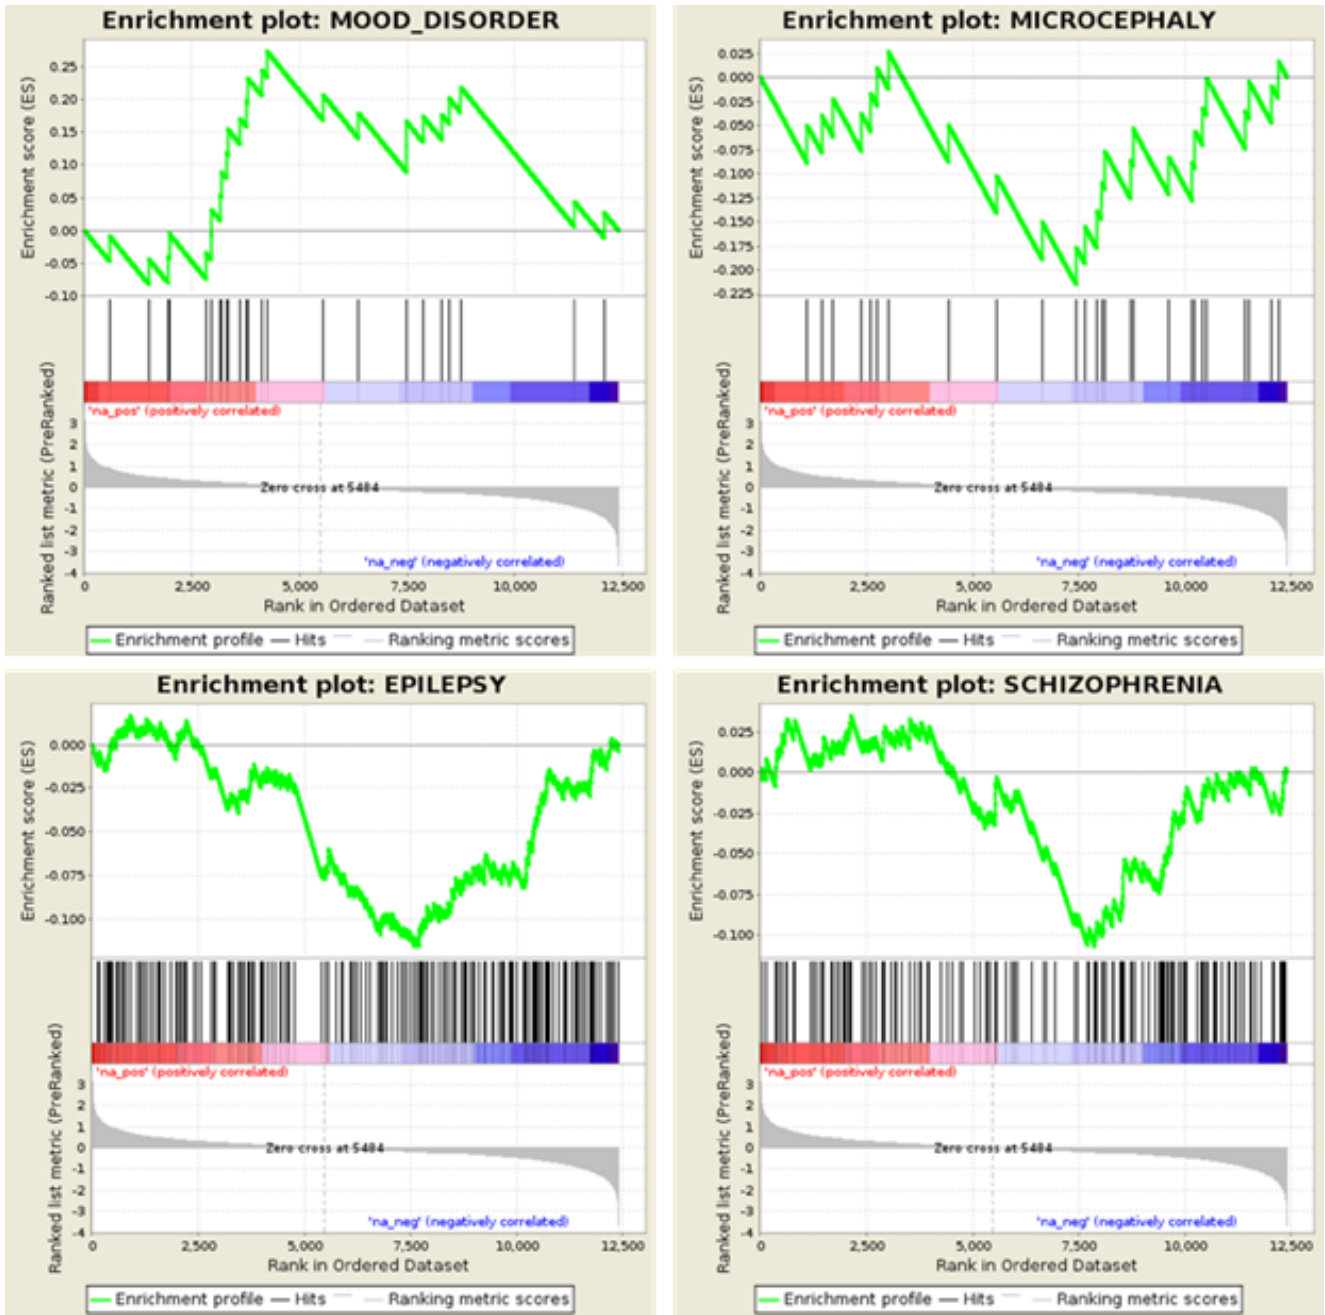

**Fig. S6. Enrichment plots of gene sets with the known or potential association to congenital Zika syndrome clinical representations in human fetuses and neonates.** We tested custom gene sets (Table S4) using GSEA and found that infected fetuses from the IC group were enriched in Mood Disorder term, and depleted in terms Microcephaly, Epilepsy, and Schizophrenia. For individual genes, see Dataset S2-Sheet 9.



1 **SI Tables**

2

3 **TABLE S1 Bio-plex assay reagents**

| <b>Cytokine</b> | <b>Capture Antibody; Supplier</b>                              | <b>Detection Antibody; Supplier; Dilution</b>                                                  | <b>Standard; Supplier; Initial Concentration</b>                        | <b>Bead; Supplier</b>               |
|-----------------|----------------------------------------------------------------|------------------------------------------------------------------------------------------------|-------------------------------------------------------------------------|-------------------------------------|
| IFN $\alpha$    | MAB anti porcine IFN $\alpha$ ;<br>GeneTex GTX11408            | MAB anti pig IFN $\alpha$ ;<br>PBL 27105-1;<br>biotinylated in house;<br>1/5000 dilution       | Recombinant porcine IFN $\alpha$ ;<br>Genentech (gift);<br>200 pg/mL    | Region 45;<br>BioRad<br>MC10045-01  |
| IFN $\gamma$    | MAB anti porcine<br>IFN $\gamma$ ; Fisher<br>ENMP700           | MAB anti porcine IFN $\gamma$ ;<br>Fisher ENPP700;<br>biotinylated in-house;<br>1/400 dilution | Recombinant porcine IFN $\gamma$ ;<br>Ceiba Geigy (gift);<br>2000 pg/ml | Region 43;<br>BioRad<br>MC10043-01  |
| IL-1 $\beta$    | MAB anti porcine IL1 $\beta$ /<br>IF2; R&D MAB6811             | Goat anti porcine IL1 $\beta$ /IF2 biotin;<br>R&D BAF681;<br>0.5 ug/ml                         | recombinant porc IL1 $\beta$ /IF2;<br>R&D 681-PI-10;<br>5000 pg/ml      | Region 26;<br>BioRad<br>MC10026-01  |
| IL-6            | Goat anti porcine IL-6;<br>R&D AF686                           | Goat anti porcine IL-6 biotin;<br>R&D BAF686;<br>0.5 ug/mL                                     | Recombinant porcine IL-6;<br>R&D 686-PI-025;<br>5000 pg/mL              | Region 65;<br>BioRad<br>MC10065-01  |
| IL-8            | MAB anti sheep IL8 (86.9%<br>homology);<br>AbD Serotec MCA1660 | MAB anti porcine CXCL8/IL8 biotin;<br>R&D MAB5351;<br>biotinylated in house;<br>1/400 dilution | Recombinant porcine IL-8;<br>Kingfisher RP0109S-005;<br>200 pg/ml       | Region 27;<br>BioRad<br>MC10027-01  |
| IL-10           | MAB anti swine IL-10;<br>Invitrogen ASC0104                    | MAB anti swine IL-10 biotin;<br>Invitrogen ASC9109;<br>0.5 ug/mL                               | Recombinant swine IL-10;<br>Invitrogen PSC0104;<br>5000 pg/mL           | Region 28;<br>BioRad<br>MC10028-01  |
| IL-12           | MAB anti porcine IL-12;<br>Kingfisher MA0413S-100              | MAB anti porcine IL12/IL23 p40<br>biotin;<br>R&D BAM9122;<br>0.5 ug/mL                         | Recombinant porcine IL-12;<br>R&D 912-PL-025;<br>5000 pg/mL             | Region 36;<br>BioRad<br>MC10036-01  |
| IL-13           | Goat anti swine IL-13;<br>Kingfisher PB0094S-100               | Goat anti swine IL-13 biotin;<br>Kingfisher PBB0096S-050;<br>0.5 ug/ml                         | Recombinant swine IL-13;<br>Kingfisher RP0007S-005;<br>5000 pg/ml       | Region 52 ;<br>BioRad<br>MC10052-01 |
| IL-17A          | Rabbit anti porcine IL-17A;<br>Kingfisher KP0498S-100          | Rabbit anti porcine IL-17A biotin;<br>Kingfisher KPB0499S-050;<br>0.1 ug/mL                    | Recombinant porcine IL-17A;<br>Kingfisher RP0128S-005;<br>2000 pg/mL    | Region 62;<br>BioRad<br>MC10062-01  |

4

1

2 **TABLE S2** Body measurements in fetuses

| Litter             | Fetus | Body length (mm) | Cranium diameter (mm) |
|--------------------|-------|------------------|-----------------------|
| <b>G312 C*</b>     | 1M    | 220              | 36                    |
|                    | 2F    | 220              | 38                    |
|                    | 3M    | 220              | 38                    |
|                    | 4M    | 210              | 35                    |
|                    | 5M    | 215              | 36                    |
|                    | 6F    | 240              | 37                    |
|                    | 7M    | 220              | 36                    |
|                    | 8F    | 220              | 36                    |
|                    | 9F    | 215              | 37                    |
|                    | 10M   | 205              | 37                    |
|                    | 11F   | 200              | 36                    |
|                    | 12M   | 210              | 39                    |
|                    | 13F   | 195              | 35                    |
|                    | 14M   | 225              | 37                    |
| <b>G314 IC*</b>    | 1F    | 235              | 38                    |
|                    | 2F    | 255              | 37                    |
|                    | 3F    | 225              | 36                    |
|                    | 4M    | 230              | 38                    |
|                    | 5M    | 240              | 37                    |
|                    | 6F    | 240              | 37                    |
|                    | 7M    | 220              | 21                    |
|                    | 8M    | 235              | 38                    |
|                    | 9F    | 230              | 36                    |
|                    | 10F   | 240              | 38                    |
|                    | 11F   | 200              | 37                    |
|                    | 12F   | 190              | 33                    |
|                    | 13F   | 202              | 33                    |
|                    | 14F   | 220              | 40                    |
| <b>G313 IP+IA*</b> | 1F    | 225              | 39                    |
|                    | 2F    | 220              | 38                    |
|                    | 3F    | 205              | 39                    |
|                    | 4na   | m                | m                     |
|                    | 5na   | m                | m                     |
|                    | 6na   | m                | m                     |
|                    | 7F    | 225              | 38                    |
|                    | 8M    | 225              | 31                    |
|                    | 9M    | 195              | 36                    |
|                    | 10M   | 225              | 38                    |
|                    | 11F   | 210              | 36                    |
|                    | 12na  | m                | m                     |
|                    | 13F   | 230              | 40                    |
|                    | 14na  | m                | m                     |
|                    | 15na  | m                | m                     |

3 \*IC – three conceptuses (in red) were inoculated with Zika virus (ZIKV) intracerebrally or mock-inoculated (in green) with virus-free media;

4 IP+IA – three conceptuses (in red) were inoculated with ZIKV intraperitoneally + intra-amniotic or mock-inoculated (in green) with virus-free

5 media; C - a control gilt; four conceptuses (in green) in the uterus were inoculated with media IC and IP+IA. All inoculations were made at 50

6 days of gestation and litters were sampled 28 days later.

7 M and F – Male and Female. m – Mummified fetuses. na – Not available.

8

3 **TABLE S3** Virological data in fetuses sampled for RNA-seq analysis

| Gilt        | Group          | Fetal #    | Distance <sup>a</sup> | ZIKV PCR titers <sup>b</sup> |        |     |     |     | Infectious ZIKV <sup>c</sup> | Serology <sup>d</sup> |     |
|-------------|----------------|------------|-----------------------|------------------------------|--------|-----|-----|-----|------------------------------|-----------------------|-----|
|             |                |            |                       | Brain (cerebrum)             | Plasma | PL  | AM  | AF  | AF                           | IgM                   | IgG |
| <b>G270</b> | <b>Control</b> | <b>1-6</b> | na                    | neg                          | neg    | neg | neg | neg | neg                          | neg                   |     |
| <b>G295</b> | <b>IC</b>      | <b>2</b>   | 12                    | 2                            | neg    | 1.1 | 1.1 | neg | neg                          | neg                   |     |
|             |                | <b>7</b>   | 7                     | 1.7                          | neg    | 1.1 | 4   | 2   | neg                          | neg                   |     |
|             |                | <b>10</b>  | 4                     | 1.7                          | 1.1    | na  | na  | 4.3 | neg                          | neg                   |     |
| <b>G296</b> | <b>IP+IA</b>   | <b>3</b>   | 10                    | 0.8                          | neg    | 3.8 | 3.8 | 4.5 | 1.2                          | neg                   |     |
|             |                | <b>8</b>   | 5                     | 0.9                          | 0.5    | 3.2 | 6.4 | 5.1 | 1.9                          | neg                   |     |
|             |                | <b>11</b>  | 2                     | 0.7                          | neg    | 4.4 | 5.8 | 5.1 | 2.2                          | 3                     |     |

4 <sup>a</sup>Samples from non-manipulated fetuses which acquired Zika virus (ZIKV) via trans-fetal infection were selected for RNA-seq analyses. The distance is the number of fetuses to a closest sibling directly challenged with ZIKV.

5 <sup>b</sup>ZIKV RNA U per ml or g. <sup>c</sup>log<sub>10</sub> TCID<sub>50</sub>/ml of ZIKV. <sup>d</sup>log<sub>2</sub>

6 “neg” negative.

7 IC – three fetuses in the uterus were inoculated with ZIKV intracerebrally.

8 IP+IA – three fetuses in the uterus were inoculated with ZIKV intraperitoneally+intra-amniotic.

9 na – not available. PL – placenta. AM – amniotic membrane. AF – amniotic fluid.

10

11 **TABLE S4** Custom gene sets

12

13

| <b>Microcephaly</b> |
|---------------------|
| ASPM                |
| CASC5               |
| CENPF               |
| MCPH1               |
| RBBP8               |
| STIL                |
| TBR2                |
| CEP152              |
| WDR62               |
| BUB1B               |
| ORC1                |
| PLK4                |
| KIF11               |
| PLK1                |
| EOMES               |
| INCENP              |
| NDE1                |
| SLC25A19            |
| MFSD2A              |
| NBN                 |
| CENPJ               |
| ACTB                |
| WHSC1               |
| BCCIP               |
| HCEC1               |
| CEP135              |
| ACTG1               |
| DIAPH1              |
| IER3IP1             |
| ZNF335              |
| CTCF                |
| BRAT1               |

CDK5RAP2  
POMT2  
EFTUD2  
PNKP  
TRMT10A  
EPC2  
MBD5  
VRK2  
NAALADL2  
NLGN1  
XRCC4  
CASK

**Epilepsy**

SCN1A  
SCN8A  
STXBP1  
TRIM8  
FHF1  
ARX  
SLC25A22  
KCNQ2  
CDKL5  
PCDH19  
STX1B  
CACNA1A  
ATP1A2  
ALDH7A1  
BRD2  
CACNA1H  
CACNB4  
CASR  
CHRNA2  
CHRNA4  
CHRN2  
CLCN2CSTB

EFHC1  
EPM2A  
GABRA1  
GABRB3  
GABRD  
GABRG2  
GPR98  
GRIN2A  
GRIN2B  
KCNMA1  
KCNQ3  
KCTD7  
MBD5  
ME2  
NHLRC1  
PRICKLE1  
PRICKLE2  
SCARB2  
SCN1B  
SCN2A  
SCN9A  
SLC2A1  
TBC1D24  
ARHGEF9  
CNTNAP2  
FOXP1  
MAPK10  
MECP2  
NRXN1  
PNKP  
RNASEH2A  
RNASEH2B  
RNASEH2C  
SAMHD1  
SLC9A6  
SPTAN1

TCF4  
TREX1  
UBE3A  
ZEB2  
ARFGEF2  
COL18A1  
COL4A1  
CPT2  
DCX  
EMX2  
EOMES  
FGFR3  
FKRP  
FKTN  
FLNA  
GPR56  
LAMA2  
LARGE  
PAFAH1B1  
PAX6  
PEX7  
POMGNT1  
POMT1  
POMT2  
PQBP1  
RAB3GAP  
RELN  
SNAP29  
SRPX2  
TUBA1A  
TUBA8  
TUBB2B  
VDAC1  
WDR62  
ASPM  
ATR

BUB1B  
CASK  
CDK5RAP2  
CENPJ  
CEP152  
LIG4  
MCPH1  
MED17  
NHEJ1  
PCNT  
RARS2  
SLC25A19  
STIL  
TSEN2  
TSEN34  
TSEN54  
VRK1  
AHI1  
ARL13B  
CC2D2A  
CEP290  
INPP5E  
NPHP1  
RPGRIP1L  
TMEM216  
TMEM67  
FGF8  
GLI2  
GLI3  
PTCH1  
SHH  
SIX3  
TGIF  
ZIC2  
ATP6AP2  
ATRX



CUL4B  
CXORF5  
FGD1  
GPC3  
GRIA3  
HSD17B10  
JARID1C  
OPHN1  
PAK3  
PHF6  
PLP1  
RAB39B  
SMC1A  
SMS  
SYP  
ABCC8  
ACY1  
ADSL  
ALDH4A1  
ALDH5A1  
ARG1  
ATIC  
BTD  
DPYD  
ETFA  
ETFB  
ETFDH  
FH  
FOLR1  
GAMT  
GCDH  
GCSH  
GCST  
GLDC  
HPD  
L2HGDH

MOCS1  
MOCS2  
PGK1  
PRODH  
QDPR  
SLC25A15  
SLC46A1  
SUOX  
APTX  
ATPAF2  
BCS1L  
C12ORF65  
C8ORF38  
CABC1  
COQ2  
COQ9  
COX10  
COX15  
DLD  
LRPPRC  
NDUFA2  
NDUFS1  
NDUFS3  
NDUFS4  
NDUFS7  
NDUFS8  
NDUFV1  
PC  
PDHA1  
PDSS1  
PDSS2  
POLG  
SCO2  
SDHA  
SURF1  
TACO1

TMEM70  
CLN3  
CLN5  
CLN6  
CLN8  
CTSD  
MFSD8  
PPT1  
TPP1  
AGA  
ARSA  
ARSB  
CTSA  
FUCA1  
GALC  
GALNS  
GLB1  
GNE  
GNPTAB  
GNPTG  
GNS  
GUSB  
HEXA  
HEXB  
HGSNAT  
HYAL1  
IDS  
IDUA  
MCOLN1  
NAGLU  
NEU1  
NPC1  
NPC2  
PSAP  
SGSH  
SLC17A5

SMPD1  
SUMF1  
ALG1  
ALG12  
ALG2  
ALG3  
ALG6  
ALG8  
ALG9  
B4GALT1  
COG1  
COG7  
COG8  
DPAGT1  
DPM1  
DPM3  
GCS1  
MGAT2  
MPDU1  
MPI  
PMM2  
RFT1  
SLC35A1  
SLC35C1  
TMEM15  
PEX1  
PEX12  
PEX14  
PEX2  
PEX26  
PEX3  
PEX5  
PEX6  
ASPA  
EIF2B1  
EIF2B2

EIF2B3  
EIF2B4  
EIF2B5  
GFAP  
MLC1  
NOTCH3  
BRAF  
CBL  
HRAS  
KRAS  
MAP2K1  
MAP2K2  
MYST4  
NF1  
NRAS  
PTPN11  
RAF1  
SHOC2  
SOS1  
SPRED1  
GLRA1  
GLRB  
GPHN  
SLC6A5  
A2BP1  
ATP2A2  
ATP6V0A2  
CCDC88C  
CLCNKA  
CLCNKB  
COH1  
KCNA1  
KCNJ1  
KCNJ10  
KIAA1279  
LBR

LGI1  
MLL2  
NIPBL  
PANK2  
PI12  
PIGV  
PLA2G6  
RAI1  
SETBP1  
SLC4A10  
SMC3  
SYNGAP1  
TBX1  
TSC1  
TSC2  
VPS13A

**Dysphagia**

DMPK  
MEGF10  
COX10  
NDUFS7  
NDUFS8  
SURF1  
SLC52A3  
NDUFAF5

**Clubfoot**

CHST14  
PITX1  
TPM2  
TBX4  
MYH3  
TNNT3  
HOXD10  
CHST3

HOXD13  
ZNF664  
CHST3  
MYBPC1  
WNT7A  
HOXA9  
TPM1  
FOXN3  
SORCS1  
MMP7  
TMEM123  
CHST14  
CAND2  
NAT1  
NAT2  
CASP10

**Arthrogryposis**

TNNI2  
TNNT3  
TPM2  
MYH3  
MYH8  
UBE1  
DMPK  
LMNA  
MYBPC1  
PIEZO2  
FBN2  
MYBPC2  
ADGRG6  
MYH6  
IGHD4-11  
SLC35A3

**Guillain-Barre Syndrome**

PMP22  
TNF  
CD79A  
MBP  
ALB  
GALE  
HLA-DQB1  
HP  
TNFRSF1A  
MPZ  
TNFRSF1B  
HLA-DQA1  
CD40LG

**Schizophrenia**

DISC1  
HTR2A  
COMT  
RGS4  
DRD3  
MTHFR  
SYN2  
RTN4R  
CHI3L1  
CD40LG  
ETM1  
TAAR6  
DTNBP1  
DAOA  
NRG1  
DAO  
DISC2  
PRODH  
DRD2  
AKT1  
SCZD6



SCZD1  
SCZD2  
SCZD7  
SCZD8  
SCZD3  
SCZD11  
SCZD5  
SCZD12  
APOL2  
RELN  
NPAS3  
APOL4  
DRD4  
CHRNA7  
ECSCR  
SHANK3  
NOTCH4  
PRL  
CLINT1  
GABRB1  
KCNN3  
BDNF  
TPH1  
ZDHHC8  
SLC6A4  
PDE4B  
QKI  
ZNF804A  
NRXN1  
GRIK3  
GRM3  
HTR1A  
NRG3  
FZD3  
HTR2C  
CYP2D6

SLC1A1  
GAD1  
MC4R  
SULT4A1  
SLC6A3  
PPP3CC  
GRIN1  
DBH  
CPLX2  
DGCR6  
LRRTM1  
DRD1  
YWHAH  
GRIN2B  
HTR3A  
NTF3  
TSNAX-DISC1  
NOS1  
CACNG2  
FEZ1  
NTS  
GRM1  
DRD5  
GRIA4  
CHRM1  
GRIK4  
GRIA1  
ARVCF  
GNAL  
PDLIM5  
SYN3  
GRM2  
FOLH1  
MAOA  
MED12  
PVALB

GRIN2C  
RTN4  
HTR7  
CYP1A2  
PIP4K2A  
CHRNA4  
FXVD6  
HTR6  
NDUFV2  
DPYSL2  
GABBR1  
NTNG1  
CNTNAP2  
GRIN2A  
HRH2  
MAP6  
ITIH3  
VRK2  
GRM5  
PPP1R1B  
GRIN3B  
ERBB4  
SP4  
ERVW-1  
CHRFAM7A  
SRR  
TH  
MIAT  
DLG4  
NOS1AP  
CACNG5  
MEGF10  
UHMK1  
SLC6A9  
CNR1

RSRC1  
ASTN2  
SMARCA2  
MAOB  
ATP2A2  
TSNAX  
SELENBP1  
CDC42SE2  
PLA2G4A  
KYAT1  
MIR137  
TBX1  
SNAP25  
SLC6A1  
GRM4  
GRIK5  
CACNA1C  
SEMA3A  
SLC17A7  
GPR78  
ADRA2A  
NR4A2  
CNP  
MOBP  
CALB1  
HRH3  
CHN2  
GRIK1  
DLG3  
CNIH1  
GRID1  
CYP3A4  
CALB2  
GRIK2  
CNIH2  
INS

ANK3  
HCRT  
APOD  
PAFAH1B1  
GRIA2  
PICK1  
SLC18A1  
IMPA2  
HTR1B  
CCK  
NRGN  
SLC18A2  
TPH2  
PLXNA2  
NCS1  
CHL1  
EGR3  
CHRN2  
ADRA1A  
GABRA4  
CCKAR  
GRIA3  
SLC1A2  
HINT1  
MLC1  
GABRB3  
DGKH  
SST  
WWC1  
SCZD10  
CRP  
GNB3  
GAP43  
ACSL6  
APOL1  
NPY

PCNT  
GSK3B  
GABRA5  
GAD2  
FAN1  
NTRK2  
SLC6A2  
VIPR2  
MICB  
ADORA2A  
MAP2  
GSTT2  
PIK3C3  
SLC6A5  
ST8SIA2  
TACR3  
TIMELESS  
PLA2G6  
SCZD4  
SCZD13  
CALY  
SLC1A3  
PAX6  
CIT  
IL2RB  
TDO2  
HTR1D  
DNMT1  
MAG  
APP  
MBP  
MARCKS  
PSAT1  
ADGRA3  
NMBR  
ULK4

SLC27A5  
NPAS2  
ARNTL  
C9orf72  
SLC17A6  
GABRG2

**Attention Deficit-Hyperactivity Disorder**

DRD4  
DRD5  
MECP2  
ADHD4  
ADHD1  
ADHD2  
ADHD3  
SLC6A3  
TPH2  
COMT  
SLC9A9  
SLC6A2  
ADRA2A  
DOCK3  
SLC6A4  
DBH  
HTR1B  
MAOA  
CHRNA4  
DRD2  
DRD1  
SNAP25  
ADRA2C  
BDNF  
HTR2A  
THRB  
HTR2C  
DRD3

SLC18A2  
ADRA1A  
MAOB  
GRIN2A  
CHRNA7  
FMR1  
TPH1  
CYP2D6  
HRH3  
ADGRL3  
HK1  
TTF2  
CDH13  
GRM7  
CHRFAM7A  
HTR1A  
TH  
HTR1E  
CALY  
GFOD1  
CLOCK  
GIT1  
PRTG  
TACR1  
HTR1D  
NTF3  
SYN3  
FOS  
PPP1R1B  
STS  
IMMP2L  
CES1  
DCDC2  
CNTNAP2  
ARRB2  
SLC6A1



IPO11  
GRM5  
NTRK2

**Anxiety Disorder**

SLC6A4  
HTR1A  
HTR2A  
BDNF  
MAOA  
COMT  
TPH2  
CRHR1  
DRD2  
CCK  
SLC6A3  
NPY  
SLC6A2  
TPH1  
RGS2  
ADCYAP1R1  
TSPO  
HTR3A  
DRD4  
OXT  
OXTR  
PRL  
DRD3

**Mood Disorder**

BDNF  
SLC6A4  
HTR1A  
HTR2A  
MAOA  
COMT

DRD4  
CRH  
CACNA1C  
DRD2  
CREB1  
NR3C1  
PER3  
IL6  
POMC  
HTR1B  
MAOB  
TH  
SLC18A2  
XK  
NPY  
TACR1  
PLA2G4A  
ACE  
DNMT1  
ADCY8  
CNR1  
GLUL  
MAPK1  
GFAP  
IL2  
NGFR

**Learning Disability**

CDH8  
MECP2  
COLEC11  
PSAP  
NPAS3  
MEIS2  
PURA  
MASP1

MAPT  
ZIC1  
CNTF  
OMG  
KIAA0319  
DYX1C1  
DCDC2  
EIF4A3  
NT5C2  
CLPP  
MYCN

**Psychotic Disorder**

DISC1  
COMT  
BDNF  
RGS4  
SLC6A4  
PRODH  
SLC1A1  
PRL  
S100B  
SLC18A2  
AKT1  
MAOB  
GABRB3  
HLA-A  
SMARCA2  
SHANK3  
DTNBP1  
NRG1  
HTR2A  
FXJD6  
DRD2  
GRM2  
PVALB

ZNF804A  
EP300  
GRM3  
HTR1A  
DRD3  
RELN  
HTR2C  
GAD1  
CHRNA4  
SLC27A5  
DAOA  
PNP  
PIK3CD  
CHRFAM7A  
CHRNA7

14

15

16

17

18

19

20

21

22

23

9 **TABLE S5** Body measurements in neonates exposed to ZIKV *in utero*

| Litter              | Piglet                 | Body length (cm) |         | Body weight (g) |         | Brain weight (g) | Brain/Body weight ratio |
|---------------------|------------------------|------------------|---------|-----------------|---------|------------------|-------------------------|
|                     |                        | 1 day            | 21 days | 1 day           | 21 days | 21 days          | 21 days                 |
| <b>G319<br/>C*</b>  |                        |                  |         |                 |         |                  |                         |
|                     | 1F                     | 37.7             | 53.5    | 1500            | 5900    | 4.9              | 0.08                    |
|                     | 2F                     | 40.1             | 54      | 1500            | 6700    | 4.84             | 0.07                    |
|                     | 3M (e-1)               | 32.2             | na      | 700             | na      | na               | na                      |
|                     | 4M                     | 37.3             | 51      | 1100            | 5200    | 4.8              | 0.09                    |
|                     | 5F                     | 38.9             | 57.5    | 1600            | 7200    | 4.75             | 0.07                    |
|                     | 6M                     | 35.3             | 41      | 900             | 2200    | 4.01             | 0.18                    |
|                     | 7F                     | 38.8             | 56.5    | 1700            | 7200    | 5.10             | 0.07                    |
|                     | 8M                     | 39.1             | 55.5    | 1700            | 7100    | 5.17             | 0.07                    |
|                     | <b>100M (d-0)</b>      | 34.5             | na      | na              | na      | na               | na                      |
| <b>m</b>            | na                     | na               | na      | na              | na      | na               |                         |
| <b>m</b>            | na                     | na               | na      | na              | na      | na               |                         |
| <b>m</b>            | na                     | na               | na      | na              | na      | na               |                         |
| <b>G320<br/>IC*</b> |                        |                  |         |                 |         |                  |                         |
|                     | 9M                     | 36.7             | 48      | 1300            | 4000    | 4.75             | 0.12                    |
|                     | 10M                    | 33.9             | 44      | 1000            | 3000    | 4.42             | 0.15                    |
|                     | 11M                    | 33.6             | 47      | 1000            | 3800    | 4.28             | 0.11                    |
|                     | 12F                    | 36.7             | 48      | 1200            | 3700    | 4.31             | 0.12                    |
|                     | 13M                    | 39.6             | 52      | 1700            | 5700    | 4.65             | 0.08                    |
|                     | 14M                    | 40.4             | 53.5    | 1800            | 5700    | 4.55             | 0.08                    |
|                     | 15F                    | 39.2             | 51      | 1500            | 4700    | 4.99             | 0.11                    |
|                     | 16M                    | 37.7             | 52.5    | 1500            | 5000    | 5.6              | 0.11                    |
|                     | 17F                    | 44               | 56.5    | 1900            | 7100    | 5.15             | 0.07                    |
|                     | 18F                    | 37.5             | 50      | 1800            | 4500    | 4.77             | 0.11                    |
|                     | 19F                    | 31.2             | 40.5    | 1300            | 1700    | 3.94             | 0.23                    |
|                     | 20M                    | 36.5             | 49      | 1400            | 4100    | 4.43             | 0.11                    |
|                     | 21M (d-3)              | 30               | na      | 600             | na      | Na               | na                      |
|                     | 22F                    | 37.2             | 53      | 1600            | 5200    | 4.91             | 0.09                    |
|                     | <b>140F (d-0)</b>      | 34               | na      | na              | na      | na               | na                      |
|                     | <b>170F (d-0)</b>      | 39.5             | na      | na              | na      | na               | na                      |
|                     | <b>160M (d-0)</b>      | 33.5             | na      | na              | na      | na               | na                      |
|                     | <b>150 decomposed</b>  | 27               | na      | na              | na      | na               | na                      |
|                     | <b>G321<br/>IP+IA*</b> |                  |         |                 |         |                  |                         |
| 23M (e-1)           |                        | 29.5             | na      | 700             | na      | na               | na                      |
| 24F                 |                        | 30.2             | 41      | 800             | 2600    | 3.56             | 0.14                    |
| 25F                 |                        | 32.9             | 45      | 800             | 3400    | 3.79             | 0.11                    |
| 26F                 |                        | 34.4             | 49      | 1200            | 5200    | 4.18             | 0.08                    |
| <b>100M (e-0)</b>   | 28.1                   | na               | 563     | na              | na      | na               |                         |

10 \*G319 C – Control; four fetuses in the uterus were inoculated with media; IC – three fetuses in the uterus were inoculated with Zika virus  
11 (ZIKV) intracerebrally.  
12 IP+IA – Three fetuses in the uterus were inoculated with ZIKV intraperitoneally + intra-amniotic. All inoculations were done at 50 days of  
13 gestation.  
14 M and F – Male and Female. (d/e-0/1/3) – Died/euthanized at birth (0) or at 1-3 days post birth. m – Mummified fetuses. na – Not  
15 available.

16

17

18

19

20

1 **SI Datasets**

2 **Dataset S1** CT and MRI data.

3 **Dataset S2** Differentially expressed genes.

4

5

6 **SI Videos**

7 **Video S1.** Severe seizures in a neonate #100 at birth. G321 IP+IA litter.

8

9 **Video S2.** Neonate #100 had severe seizures, did not recover and was euthanized shortly after  
10 birth. The entire G321 IP+IA litter was weak. For comparison, see **Video S11.**

11 **Video S3.** Splayed back legs in neonate #23 from the G321 IP+IA litter at 1 day after birth.

12 Other siblings remained weak for the extended time. For comparison, see **Video S7** and **Video**  
13 **S8.**

14 **Video S4.** During the study neonates from the G319 C litter remained healthy and playful. The  
15 video was recorded at 14 days after birth.

16 **Video S5.** Neonates from the G321 IP+IA litter were less active and depressed. The video is  
17 recorded at 14 days after birth.

18 **Video S6.** Neonate #24 in the G321 IP+IA litter deteriorated during the study and remained  
19 predominantly recumbent with continued seizure-like activities.

20 **Video S7.** The 319 C (control) litter at 1 day after birth.

21 **Video S8.** Neonates in the G320 IC litter had the potential increase in activity in comparison to control  
22 neonates since first days of life. The video is recorded at 1 day after birth.

- 23 **Video S9.** During the study, neonates in the G320 IC litter were continuously and aggressively  
24 fighting. The video is recorded at 14 days after birth.
- 25 **Video S10.** During the study, neonates in the G320 IC litter were continuously and aggressively  
26 fighting. The video is recorded at 21 days after birth.
- 27 **Video S11.** The G320 IC litter recorded shortly after birth.
